# Supplementary material for: Exploring the state of research on motivation in second language learning: a review and a reliability generalization meta-analysis
Source: publisher site journal article supplement (doi:10.1515/iral-2022-0115), 2023-02-03
Supplement: Supplementary file 1 [file j_iral-2022-0115_suppl.docx]

**Appendix A**

**The Scopus Search Code**


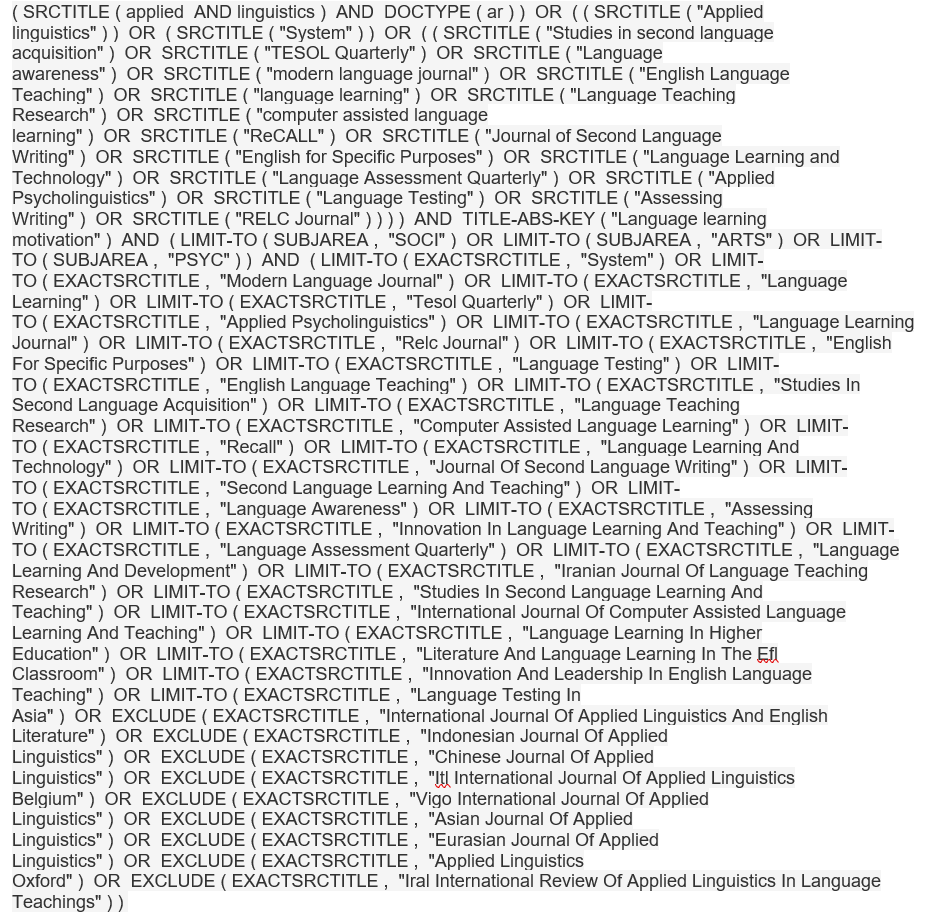


**Appendix 2**

**Decision on integrativeness**

We excluded the theory of integrativeness that was proposed by Robert Gardner (Gearing and Rogers 2019) from this study. Integrativeness refers to L2 learners’ motivation to learn a language in order to integrate with the culture of the target language or a target group. Gardner (2001) defines integrativeness as the desire for interaction and “emotional identification with another cultural group” (Gardner 2001: 5) (see Rooy 2006, for a discussion of integrativeness and its dependent constructs). Integrativeness’s ability to predict motivation is not conclusive. Some researchers contend that more people are beginning to learn languages in their home countries where they may potentially experience little to no interaction with natives of the L2 they are learning (see Gearing and Rogers 2019). For example, Lin (2020: 112-113) argued that “some concepts in the field of traditional second language motivation, such as integration into the target language population and target language culture, have already lost their original meaning. That is because English as an Esperanto, doesn’t have only one kind of its clear target population anymore, and English is actually regarded as a basic teaching skill in some areas, instead of being attached to a particular culture or community.” Other researchers have advanced similar critiques against integrativeness and its fit for the contemporary globalized world. As examining these studies falls outside of the scope of this paper, we suggest Rooy (2006) to the readers, who summarized the critiques as follows: “[t]he main foundations of the criticism of the notion of integrativeness are the simplex views of the identity of second languages learners and the incorrect assumptions made about the sociolinguistic contexts of many learners of English as a second language across the world” (Rooy 2006: 441).

In sum, many languages are used not only in their ‘native’ countries, but also in various other countries, resulting in integrativeness becoming an oversimplifying theory of LLM, particularly in cultures that are seen as different and challenging to fit into and integrate with (Gearing and Rogers 2019: 127).

**Appendix 3**

**Examination of heterogeneity**

I2 is a widely used heterogeneity index in meta-analysis research, with values ≤ 0.3 indicating low or unimportant heterogeneity; 0.3 ≤ I2≤ 0.6 representing moderate heterogeneity; and 0.6 ≤ I2 ≤ 1.00 representing strong or substantial heterogeneity (Higgins and Green 2008). The Q-test follows a chi-square distribution (degrees of freedom = k-1) and provides a formal statistical test with a p value with significant values indicating that the sample of reliability coefficients and publications are heterogenous (Lipsey and Wilson 2001).

Lipsey, Mark W. & David B. Wilson. 2001. *Practical meta-analysis*. Thousand Oaks, CA: Sage Publications.

**Appendix 4**

**Miscellaneous themes**

This section will discuss certain important factors of LLM that were found during our research but we were unable to fully classify them into any of the two theoretical frameworks mentioned in the earlier sections. Hence, we have consolidated them under the section of Miscellaneous, but this does not in any way undermine their importance. In fact, the scarcity of research on these fields and factors is a call for possible future research topics where more work can be done to uncover how these factors affect motivational trajectories in language acquisition. We will present findings on the effect of dialogism, social economic status (SES), and anagnorisis on motivation. **Dialogism.** Dialogism takes its influence from the early works of Russian philosopher Mikhail Bakhtin. Bakhtinian dialogism stresses the importance of the social context of the learner in shaping the learner’s identity, and social reality is a by-product of thought, day-to-day conversations, and writings (Lyle 2008). Dialogism hence creates meaning in people’s lives and a shared reality is maintained through the assumption that knowledge is not limited to the tenure of an individual, but a collective possession (Lyle 2008). Through dialogue and utterances, learners develop a sense of self through the ability to speak and communicate under the control of shared social responsibilities and expectations (Nakamura 2021). As such, language is an important part of assimilating and adjusting to the social world and expressing oneself. This generates motivation to learn languages, as reflected in Harvey’s (2017) research, where he narrates the journey of Dmitry, a Russian male learning English as his L2. Dmitry’s English language learning journey is nothing less of an “ideological becoming”, where he understood and saw the world through language (Harvey 2017: 72). Dmitry recognized the power English could give him in the professional sector, and this motivated him to learn the language well as he believed it gave him the chance to “see the world through its [i.e., English’s] eyes” (Harvey 2017: 73). However, after a few occasions of conversing and speaking with his friends from the UK, his motivation took a plunge as he felt that his range of conversational topics did not interest the locals, highlighting the importance of not only language competency, but also understanding cultural slangs to assimilate with its speakers. After realizing his mistake, his motivation saw an increase, as he became determined to speak English well. He would constantly step out of his comfort zone to force himself to speak to locals, understand their social norms, and soon realized the impact his own words had on the world around him and how others viewed him (Harvey 2017). Through the communicative power, he started to “see himself responsible for his own words and as a communicative agent whose utterances have an effect on the world” (Harvey 2017: 75).

Through Harvey’s (2017) work, the importance of dialogue and speeches is realized in forming learner identities, as well as influencing LLM while considering the social context. Though research using this theoretical framework is still scarce, Bakhtinian dialogism provides a different perspective on the power of language and how it subsequently affects motivation as learners navigate their new social world. It is important we continue down this line of research to reap its benefits for pedagogical applications.

**Socioeconomic status.** Socioeconomic status (SES) is another variable found to affect LLM of children and students, with lower SES students showing lower motivation to pursue an L2 compared to those of higher SES. Lower SES is related to ideological beliefs, where the beliefs of parents regarding education and language acquisition may affect children’s motivation for SLA.

Kormos and Kiddle’s (2013) quantitative research paper on the effect of SES on LLM of 740 students in a Chilean context showed an overall significant effect of SES and social class on motivational and self-regulatory variables, and autonomous learning behavior. The general effect of social class on the investigated variables was in the medium range and suggests that approximately 11% of the variance in the motivational, self-regulatory and learner autonomy scales can be explained with reference to the social class (Kormos and Kiddle 2013: 405). Post-hoc comparisons performed between the social classes showed that students from the upper and upper-middle classes had higher motivational dispositions than those of the lower, lower-middle, and middle-class students.

From the results above, the authors predicted that the effect of SES on self-efficacy beliefs (i.e., belief that one can be successful in learning a language) is one of the most important factors in LLM, and this sets those from the upper- and upper-middle class students apart from the rest. Influence from parents (partly due to parental educational levels) and their beliefs about language education also inevitably shape the motivations of their children, as more emphasis is placed on schooling and academics (Kormos and Kiddle: 2013). Students from upper classes also have the opportunity to experience good modelling (i.e., better teachers, their own parents, etc.) and develop a stronger ideal L2 self through the course of their education, something students of lower SES might not experience. However, more research needs to be done to expand this investigation to other countries, cultures and certainly other languages apart from English.

**Anagnorisis.** Anagnorisis, an instant change in attitude towards learning a language, is another interesting perspective to take into account when looking at motivation. Pigott’s (2019) study investigating the effects of critical incidences on the motivational trajectory of L2 English learners in Japan, illustrates the significance of small day-to-day events (both positive and negative ones) that affect perspective. Manami, one of the participants, mentioned a memory of a scene from the movie Titanic, which she watched during high school, where a family died because they could not read a sign that had instructions in English. Manami since believed that language can help people in need and save lives, making it a pivotal point of her language learning experience (Pigott 2019). Ryota, on the other hand, had a traumatic experience of not being able to converse in English, and saw himself as a failure. This negative experience motivated him to do well in class to avoid being insulted and ostracized again (Pigott 2019). Through these narratives and interviews, it was shown that day-to-day occurrences can make a significant difference in motivating individuals to take up a language. Factors such as teachers and classroom environment are not the only significant factors affecting motivation; small, unexpected events are sufficient to change a learner’s beliefs about language learning.
